# Supplementary material
Source: PubMed Central journal article supplement (PMC6198766)
Supplement: Supp_Fig1.pdf [file Supp_Fig1.pdf]

## Supplementary Data

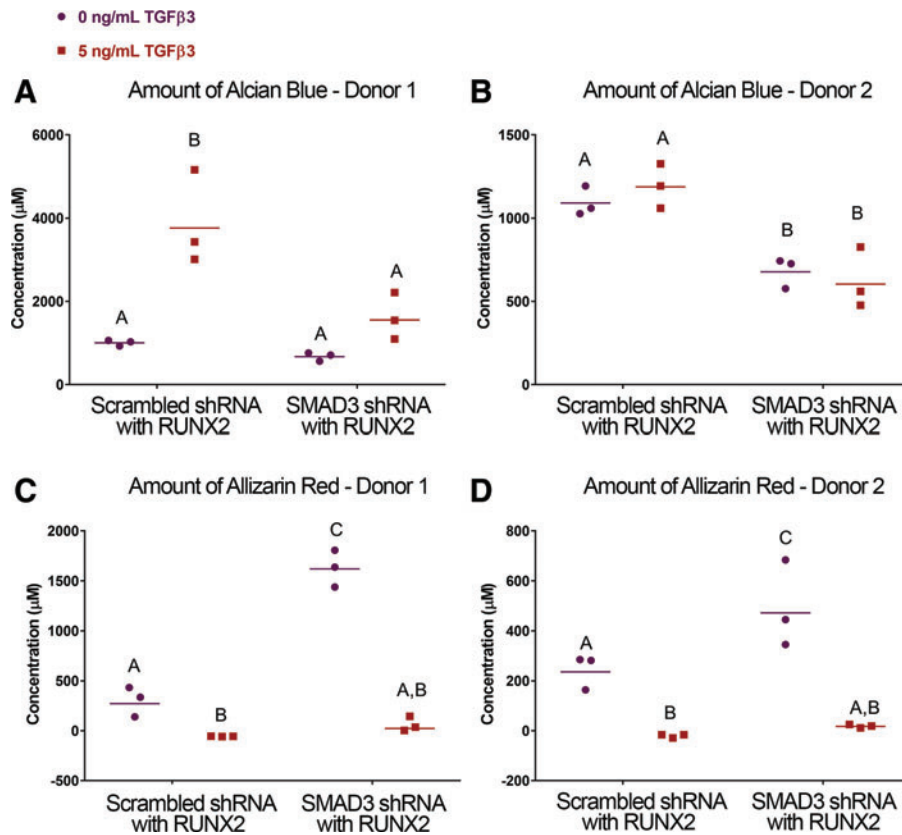

**SUPPLEMENTARY FIG. S1.** (A, B) Quantification of alcian blue dye in wells with 0 ng/mL (purple dots) or 5 ng/mL (red squares) of TGFβ3. (C, D) Quantification of alizarin red dye in wells with 0 ng/mL (purple dots) or 5 ng/mL (red squares) of TGFβ3. Experiments were performed on individual donors with Donor 1 (A, C) and Donor 2 (B, D).  $n=3$ . Points represent independent specimen. Scale bars represent geometric means for each group. Two-way ANOVA with Tukey *post hoc* test. Groups of different letters are statistically different from one another. TGFβ3, transforming growth factor β 3.
