# Supplementary material
Source: PubMed Central journal article supplement (PMC6198766)
Supplement: Supp_Fig3.pdf [file Supp_Fig3.pdf]

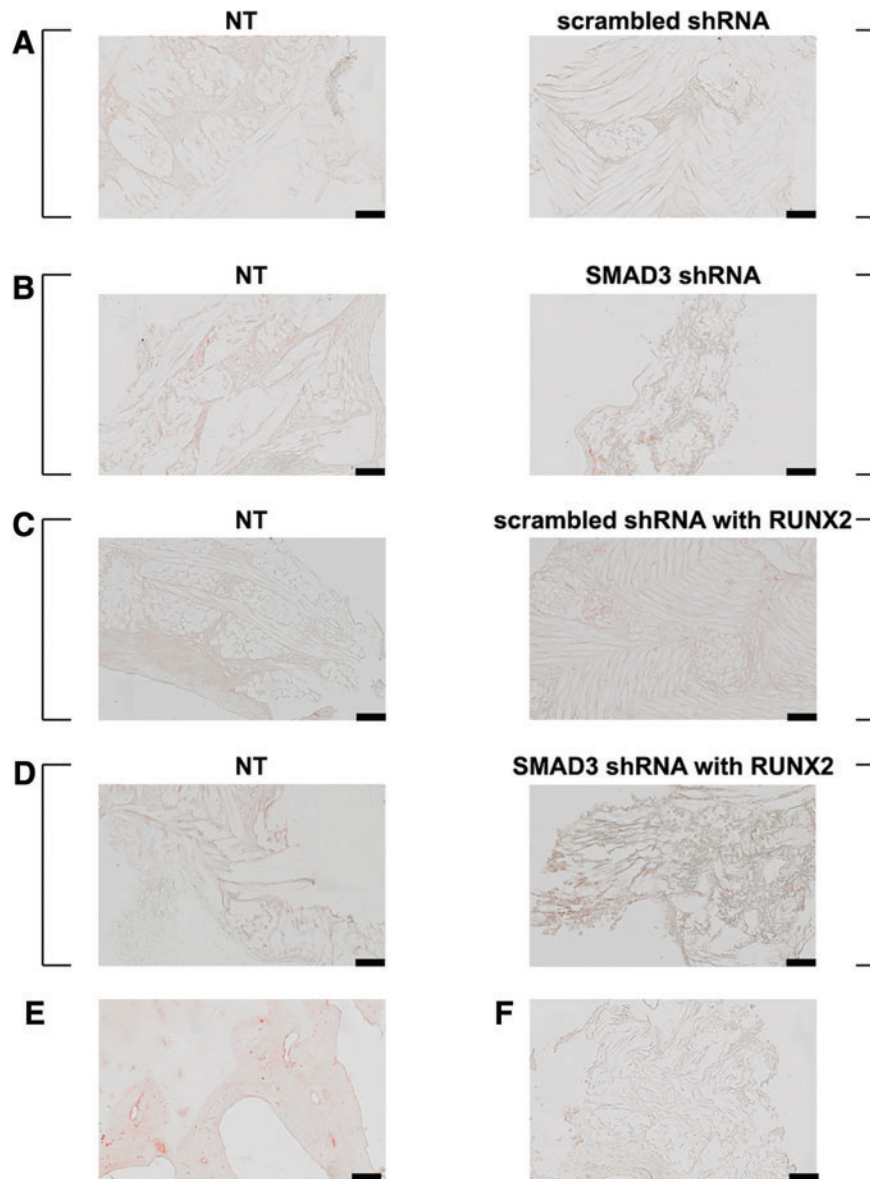

**SUPPLEMENTARY FIG. S3.** NT and virally transduced scaffolds displayed low expression of collagen type I. Immunohistochemistry staining of scaffold pairs cultured in 5 ng/mL TGF $\beta$ 3. **(A)** NT and scrambled shRNA; **(B)** NT and SMAD3 shRNA; **(C)** NT and scrambled shRNA with RUNX2; **(D)** NT and SMAD3 shRNA with RUNX2. **(E)** Human osteochondral control. **(F)** Representative negative control without primary antibody. *Square brackets* indicate scaffold pairs cultured in the same well. Type I collagen was not observed in either NT or virally transduced scaffolds. Scale bar = 100  $\mu$ m. NT, nontransduced.
