# Supplementary material
Source: PubMed Central journal article supplement (PMC6198766)
Supplement: Supp_Table1.pdf [file Supp_Table1.pdf]

SUPPLEMENTARY TABLE S1. LIST OF QUANTITATIVE  
 REAL-TIME POLYMERASE CHAIN REACTION PRIMERS  
 USED IN THIS PAPER

| <i>Primer name</i>   | <i>Primer sequence</i>       |
|----------------------|------------------------------|
| r18S forward primer  | 5'-CGGCTACCACATCCAAGGAA-3'   |
| r18S reverse primer  | 5'-GGGCCTCGAAAGAGTCCTGT-3'   |
| RUNX2 forward primer | 5'-TCCCTGAACTCTGCACCAAG-3'   |
| RUNX2 reverse primer | 5'-ATCTGGCTCAGGTAGGAGGG-3'   |
| SMAD3 forward primer | 5'-GCAGAACGTCAACACCAAGTGC-3' |
| SMAD3 reverse primer | 5'-GTGCAGGTCTGGCCATCGC-3'    |
