# Supplementary material
Source: PubMed Central journal article supplement (PMC6198766)
Supplement: Supp_Table2.pdf [file Supp_Table2.pdf]

SUPPLEMENTARY TABLE S2. VIRAL BACKBONE  
COMPONENTS

---

|               |                                                                      |
|---------------|----------------------------------------------------------------------|
| 5' LTR        | 5' long terminal repeat                                              |
| ψ             | Psi packaging signal                                                 |
| EF1α          | Elongation factor 1 alpha promoter                                   |
| cPPT          | Central polypurine tract                                             |
| dsRedExpress2 | Red fluorescent protein coding sequence<br>from <i>Discosoma sp.</i> |
| IRES          | Internal ribosomal entry site                                        |
| PuroR         | Puromycin resistance gene                                            |
| WPRE          | Woodchuck hepatitis virus<br>post-transcriptional regulatory element |
| U3PPT         | U3 polypurine tract                                                  |
| tetO          | Tetracycline operator sequence                                       |
| H1            | H1 promoter                                                          |
| shRNA         | shRNA sequence                                                       |
| SIN           | Self inactivating sequence                                           |
| 3' LTR        | 3' long terminal repeat                                              |

---
